# Supplementary material for: A Generalized Structural Equation Model Approach to Long Working Hours and Near-Misses among Healthcare Professionals in Japan
Source: MDPI journal article supplement (doi:10.3390/ijerph18137154), 2021-07-04
Supplement: s1 [file s1]

## SUPPLEMENTARY MATERIALS

Table S1. Direct, indirect, and total effects of working hours on near-misses during the past 6 months among healthcare professionals for sensitivity analysis

|                                  |         | Direct Effect               | Indirect Effect                                                |                                                          |                                                                | Total Effect        |
|----------------------------------|---------|-----------------------------|----------------------------------------------------------------|----------------------------------------------------------|----------------------------------------------------------------|---------------------|
| n/Number of<br>Near-Misses       |         | Working Hour →<br>Near-Miss | Working Hour → Job-<br>Related Stress → Fatigue<br>→ Near-Miss | Working Hour → Sleep<br>Problem → Fatigue →<br>Near-Miss | Working Hour → Depressive<br>Symptom → Fatigue → Near-<br>Miss | (Direct + Indirect) |
|                                  |         | OR (95%CI)                  | OR (95%CI)                                                     | OR (95%CI)                                               | OR (95%CI)                                                     | OR (95%CI)          |
| Model 2 in Supplemental Figure 1 |         |                             |                                                                |                                                          |                                                                |                     |
| Working<br>hours/week            |         |                             |                                                                |                                                          |                                                                |                     |
| 35-40 h/w                        | 507/231 | 1.00 (reference)            | 1.00 (reference)                                               | 1.00 (reference)                                         | 1.00 (reference)                                               | 1.00 (reference)    |
| 41-50 h/w                        | 665/338 | 1.13 (0.87, 1.44)           | 1.14 (1.08, 1.23)                                              | 1.02 (0.98, 1.05)                                        | 1.00 (0.99, 1.01)                                              | 1.30 (1.01, 1.70)   |
| 51-60 h/w                        | 170/92  | 1.12 (0.79, 1.66)           | 1.28 (1.16, 1.45)                                              | 1.05 (1.00, 1.12)                                        | 1.01 (0.98, 1.03)                                              | 1.52 (1.05, 2.25)   |
| ≥61 h/w                          | 148/80  | 1.09 (0.73, 1.59)           | 1.36 (1.21, 1.56)                                              | 1.08 (1.02, 1.16)                                        | 1.01 (0.96, 1.08)                                              | 1.61 (1.06, 2.39)   |
| Model 3 in Supplemental Figure 1 |         |                             |                                                                |                                                          |                                                                |                     |
| Working<br>hours/week            |         |                             |                                                                |                                                          |                                                                |                     |
| 35-40 h/w                        | 507/231 | 1.00 (reference)            | 1.00 (reference)                                               | 1.00 (reference)                                         | 1.00 (reference)                                               | 1.00 (reference)    |
| 41-50 h/w                        | 665/338 | 1.13 (0.87, 1.44)           | 1.14 (1.08, 1.23)                                              | 1.01 (0.98, 1.05)                                        | 1.00 (0.99, 1.01)                                              | 1.30 (1.01, 1.69)   |
| 51-60 h/w                        | 170/92  | 1.12 (0.78, 1.66)           | 1.28 (1.16, 1.46)                                              | 1.04 (0.99, 1.11)                                        | 1.01 (0.98, 1.03)                                              | 1.50 (1.04, 2.22)   |
| ≥61 h/w                          | 148/80  | 1.09 (0.73, 1.59)           | 1.36 (1.21, 1.56)                                              | 1.07 (1.01, 1.14)                                        | 1.01 (0.96, 1.08)                                              | 1.59 (1.05, 2.36)   |

OR, odds ratio; 95% CI, 95% confidence interval; h/w, hours per week

Table S2. Direct, indirect, and total effects of working hours on near-misses during the past 6 months in healthcare professionals for model including relationship among the mediated variables.

|                       |                              | Direct Effect               |                                                                | Indirect Effect                                             |                                                               |                                                                                   |                                                                                           | Total Effect<br>(Direct + Indirect) |
|-----------------------|------------------------------|-----------------------------|----------------------------------------------------------------|-------------------------------------------------------------|---------------------------------------------------------------|-----------------------------------------------------------------------------------|-------------------------------------------------------------------------------------------|-------------------------------------|
|                       | n / Number of<br>Near-Misses | Working Hour →<br>Near Miss | Working Hour → Job-<br>Related Stress →<br>Fatigue → Near Miss | Working Hour<br>→ Sleep Problem →<br>Fatigue → Near<br>Miss | Working Hour<br>→ Depressive Symptom<br>→ Fatigue → Near Miss | Working Hour → Job-<br>Related Stress<br>→ Sleep Problem →<br>Fatigue → Near Miss | Working Hour → Job-<br>Related Stress<br>→ Depressive<br>Symptom → Fatigue →<br>Near Miss |                                     |
|                       |                              | OR (95%CI)                  | OR (95%CI)                                                     | OR (95%CI)                                                  | OR (95%CI)                                                    | OR (95%CI)                                                                        | OR (95%CI)                                                                                | OR (95%CI)                          |
| Working<br>hours/week |                              |                             |                                                                |                                                             |                                                               |                                                                                   |                                                                                           |                                     |
| 35-40 h/w             | 507 / 231                    | 1.00 (reference)            | 1.00 (reference)                                               | 1.00 (reference)                                            | 1.00 (reference)                                              | 1.00 (reference)                                                                  | 1.00 (reference)                                                                          | 1.00 (reference)                    |
| 41-50 h/w             | 665 / 338                    | 1.10 (0.85, 1.42)           | 1.12 (1.07, 1.21)                                              | 0.99 (0.96, 1.01)                                           | 1.00 (0.98, 1.02)                                             | 1.02 (1.01, 1.04)                                                                 | 1.00 (0.98, 1.02)                                                                         | 1.23 (0.97, 1.64)                   |
| 51-60 h/w             | 170 / 92                     | 1.11 (0.78, 1.63)           | 1.25 (1.14, 1.41)                                              | 1.00 (0.95, 1.04)                                           | 1.00 (0.98, 1.02)                                             | 1.04 (1.02, 1.08)                                                                 | 1.00 (0.96, 1.03)                                                                         | 1.38 (1.01, 2.12)                   |
| ≥ 61 h/w              | 148 / 80                     | 1.03 (0.69, 1.53)           | 1.31 (1.18, 1.53)                                              | 1.01 (0.96, 1.06)                                           | 1.00 (0.98, 1.02)                                             | 1.05 (1.02, 1.10)                                                                 | 1.00 (0.95, 1.04)                                                                         | 1.37 (0.96, 2.21)                   |

OR, odds ratio; 95% CI, 95% confidence interval; h/w, hours per week
